# Supplementary material for: In search of preventative strategies: novel high-CBD <i>cannabis sativa</i> extracts modulate ACE2 expression in COVID-19 gateway tissues
Source: publisher site journal article supplement (doi:10.18632/aging.202225), 2020-11-24
Supplement: Supplementary file [file aging-v12i22-202225-supplementary-material-SD1.pdf]

## SUPPLEMENTARY TABLES

**Supplementary Table 1. Correlation analysis between the downregulation of ACE2 and TMPRSS2 and the level of cannabinoids.**

| <b>EpiOral#2 (Figures 3, 8)</b>   | <b>ACE2</b> | <b>TMPRSS2</b> | <b>THC</b>   | <b>CBD</b>   | <b>CBGA</b>  | <b>CBN</b>   | <b>TOTAL</b> |
|-----------------------------------|-------------|----------------|--------------|--------------|--------------|--------------|--------------|
| #1                                | 1.59        | 0.30           | 0.28         | 11.00        | 0.08         | 0.04         | 11.40        |
| #7                                | 1.10        | 0.22           | 0.35         | 10.46        | 0.09         | 0.05         | 10.95        |
| #45                               | 0.52        | 0.67           | 0.14         | 7.92         | 0.04         | 0.05         | 8.15         |
| #130                              | 0.80        | 0.08           | 0.77         | 9.04         | 0.31         | 0.06         | 10.18        |
| #131                              | 0.93        | 0.92           | 0.27         | 11.10        | 0.27         | 0.03         | 11.66        |
| #317                              | 0.71        | 0.32           | 1.00         | 21.81        | 0.62         | 0.08         | 23.51        |
| <b>Correlation</b>                | ACE2        |                | <b>-0.26</b> | <b>-0.11</b> | <b>-0.35</b> | <b>-0.42</b> | <b>-0.13</b> |
|                                   |             | TMPRSS2        | <b>-0.55</b> | <b>-0.13</b> | <b>-0.14</b> | <b>-0.53</b> | <b>-0.16</b> |
| <b>EpiOral#1 (Figure 4A)</b>      | <b>ACE2</b> |                | <b>THC</b>   | <b>CBD</b>   | <b>CBGA</b>  | <b>CBN</b>   | <b>TOTAL</b> |
| #81                               | 1.56        |                | 0.63         | 13.59        | 0.10         | 0.06         | 14.39        |
| #90                               | 1.05        |                | 1.55         | 6.18         | 0.06         | 0.18         | 7.96         |
| #130                              | 1.89        |                | 0.77         | 9.04         | 0.31         | 0.06         | 10.18        |
| #131                              | 0.86        |                | 0.27         | 11.10        | 0.27         | 0.03         | 11.66        |
| Correlation                       | ACE2        |                | -0.02        | 0.19         | 0.29         | -0.24        | 0.22         |
| <b>EpiOral#1 (Figures 4B, 7A)</b> | <b>ACE2</b> | <b>TMPRSS2</b> | <b>THC</b>   | <b>CBD</b>   | <b>CBGA</b>  | <b>CBN</b>   | <b>TOTAL</b> |
| #1                                | 1.51        | 1.32           | 0.28         | 11.00        | 0.08         | 0.04         | 11.40        |
| #7                                | 1.33        | 1.58           | 0.35         | 10.46        | 0.09         | 0.05         | 10.95        |
| #9                                | 1.60        | 2.01           | 0.31         | 10.37        | 0.31         | 0.05         | 11.03        |
| #45                               | 1.81        | 1.42           | 0.14         | 7.92         | 0.04         | 0.05         | 8.15         |
| #115                              | 1.13        | 1.42           | 0.39         | 13.52        | 0.13         | 0.09         | 14.14        |
| #129                              | 1.34        | 1.34           | 0.41         | 11.23        | 0.38         | 0.14         | 12.15        |
| #157                              | 1.37        | 1.41           | 0.27         | 11.10        | 0.27         | 0.03         | 11.66        |
| #167                              | 1.78        | 1.44           | 0.27         | 11.10        | 0.27         | 0.03         | 11.66        |
| #169                              | 1.60        | 1.24           | 0.21         | 6.13         | 0.14         | 0.06         | 6.54         |
| <b>Correlation</b>                | ACE2        |                | <b>-0.80</b> | <b>-0.63</b> | <b>-0.09</b> | <b>-0.53</b> | <b>-0.64</b> |
|                                   |             | TMPRSS2        | <b>0.17</b>  | <b>0.18</b>  | <b>0.27</b>  | <b>-0.20</b> | <b>0.19</b>  |
| <b>EpiOral#1 (Figure 4C)</b>      | <b>ACE2</b> |                | <b>THC</b>   | <b>CBD</b>   | <b>CBGA</b>  | <b>CBN</b>   | <b>TOTAL</b> |
| #1                                | 0.67        |                | 0.28         | 11.00        | 0.08         | 0.04         | 11.40        |
| #7                                | 1.31        |                | 0.35         | 10.46        | 0.09         | 0.05         | 10.95        |
| #9                                | 1.12        |                | 0.31         | 10.37        | 0.31         | 0.05         | 11.03        |
| #45                               | 0.77        |                | 0.14         | 7.92         | 0.04         | 0.05         | 8.15         |
| #115                              | 1.10        |                | 0.39         | 13.52        | 0.13         | 0.09         | 14.14        |
| #129                              | 0.97        |                | 0.41         | 11.23        | 0.38         | 0.14         | 12.15        |
| #157                              | 1.49        |                | 0.27         | 11.10        | 0.27         | 0.03         | 11.66        |
| #167                              | 1.53        |                | 0.27         | 11.10        | 0.27         | 0.03         | 11.66        |
| #169                              | 1.84        |                | 0.21         | 6.13         | 0.14         | 0.06         | 6.54         |
| <b>Correlation</b>                | ACE2        |                | <b>-0.11</b> | <b>-0.32</b> | <b>0.22</b>  | <b>-0.21</b> | <b>-0.30</b> |
| <b>EpiAir#1 (Figure 2)</b>        | <b>ACE2</b> |                | <b>THC</b>   | <b>CBD</b>   | <b>CBGA</b>  | <b>CBN</b>   | <b>TOTAL</b> |
| #5                                | 1.47        |                | 0.38         | 11.42        | 0.04         | 0.03         | 11.87        |
| #10                               | 1.79        |                | 0.38         | 9.41         | 0.24         | 0.06         | 10.09        |
| #31                               | 1.45        |                | 6.21         | 8.90         | 0.09         | 0.05         | 15.24        |
| #49                               | 1.20        |                | 0.09         | 9.06         | 0.07         | 0.04         | 9.25         |
| #81                               | 0.89        |                | 0.63         | 13.59        | 0.10         | 0.06         | 14.39        |
| #114                              | 1.27        |                | 0.18         | 10.41        | 0.11         | 0.07         | 10.76        |
| #155                              | 1.06        |                | 0.27         | 11.10        | 0.27         | 0.03         | 11.66        |
| #166                              | 0.83        |                | 0.27         | 11.10        | 0.27         | 0.03         | 11.66        |
| #169                              | 1.00        |                | 0.21         | 6.13         | 0.14         | 0.06         | 6.54         |

|                                       |             |                |              |              |              |              |              |
|---------------------------------------|-------------|----------------|--------------|--------------|--------------|--------------|--------------|
| #207                                  | 0.85        |                | 8.93         | 7.84         | 0.23         | 0.08         | 17.08        |
| <b>Correlation</b>                    | ACE2        |                | <b>-0.15</b> | <b>-0.06</b> | <b>-0.27</b> | <b>-0.16</b> | <b>-0.20</b> |
| <b>EpiIntestinal (Figures 5A, 7B)</b> | <b>ACE2</b> | <b>TMPRSS2</b> | <b>THC</b>   | <b>CBD</b>   | <b>CBGA</b>  | <b>CBN</b>   | <b>TOTAL</b> |
| #1                                    | 0.95        | 1.20           | 0.28         | 11.00        | 0.08         | 0.04         | 11.40        |
| #7                                    | 0.88        | 1.28           | 0.35         | 10.46        | 0.09         | 0.05         | 10.95        |
| #9                                    | 1.02        | 1.27           | 0.31         | 10.37        | 0.31         | 0.05         | 11.03        |
| #45                                   | 2.35        | 1.44           | 0.14         | 7.92         | 0.04         | 0.05         | 8.15         |
| #115                                  | 0.88        | 1.28           | 0.39         | 13.52        | 0.13         | 0.09         | 14.14        |
| #129                                  | 1.17        | 1.43           | 0.41         | 11.23        | 0.38         | 0.14         | 12.15        |
| #130                                  | 1.24        | 1.48           | 0.77         | 9.04         | 0.31         | 0.06         | 10.18        |
| #167                                  | 0.97        | 1.51           | 0.27         | 11.10        | 0.27         | 0.03         | 11.66        |
| #274                                  | 0.88        | 1.29           | 0.30         | 13.93        | 0.38         | 0.04         | 14.64        |
| <b>Correlation</b>                    | ACE2        |                | <b>-0.27</b> | <b>-0.72</b> | <b>-0.35</b> | <b>-0.04</b> | <b>-0.75</b> |
|                                       |             | TMPRSS2        | <b>0.26</b>  | <b>-0.44</b> | <b>0.30</b>  | <b>0.15</b>  | <b>-0.38</b> |
| <b>EpiIntestinal (Figure 5B)</b>      | <b>ACE2</b> |                | <b>THC</b>   | <b>CBD</b>   | <b>CBGA</b>  | <b>CBN</b>   | <b>TOTAL</b> |
| #1                                    | 1.41        |                | 0.28         | 11.00        | 0.08         | 0.04         | 11.40        |
| #7                                    | 1.19        |                | 0.35         | 10.46        | 0.09         | 0.05         | 10.95        |
| #9                                    | 0.92        |                | 0.31         | 10.37        | 0.31         | 0.05         | 11.03        |
| #45                                   | 1.92        |                | 0.14         | 7.92         | 0.04         | 0.05         | 8.15         |
| #115                                  | 1.02        |                | 0.39         | 13.52        | 0.13         | 0.09         | 14.14        |
| #129                                  | 1.23        |                | 0.41         | 11.23        | 0.38         | 0.14         | 12.15        |
| #130                                  | 1.00        |                | 0.77         | 9.04         | 0.31         | 0.06         | 10.18        |
| #167                                  | 1.15        |                | 0.27         | 11.10        | 0.27         | 0.03         | 11.66        |
| #274                                  | 1.02        |                | 0.30         | 13.93        | 0.38         | 0.04         | 14.64        |
| <b>Correlation</b>                    | ACE2        |                | <b>-0.54</b> | <b>-0.56</b> | <b>-0.63</b> | <b>-0.11</b> | <b>-0.64</b> |
| <b>EpiAirwayFT#2 (Figures 6A, 9A)</b> | <b>ACE2</b> | <b>TMPRSS2</b> | <b>THC</b>   | <b>CBD</b>   | <b>CBGA</b>  | <b>CBN</b>   | <b>TOTAL</b> |
| #1                                    | 6.74        | 0.88           | 0.28         | 11.00        | 0.08         | 0.04         | 11.40        |
| #5                                    | 3.28        | 0.88           | 0.38         | 11.42        | 0.04         | 0.03         | 11.87        |
| #7                                    | 4.27        | 0.81           | 0.35         | 10.46        | 0.09         | 0.05         | 10.95        |
| #10                                   | 3.20        | 0.95           | 0.38         | 9.41         | 0.24         | 0.06         | 10.09        |
| #81                                   | 1.45        | 0.73           | 0.63         | 13.59        | 0.10         | 0.06         | 14.39        |
| #129                                  | 3.37        | 0.76           | 0.41         | 11.23        | 0.38         | 0.14         | 12.15        |
| #169                                  | 5.57        | 0.83           | 0.21         | 6.13         | 0.14         | 0.06         | 6.54         |
| #317                                  | 7.06        | 0.93           | 1.00         | 21.81        | 0.62         | 0.08         | 23.51        |
| <b>Correlation</b>                    | ACE2        |                | 0.14         | 0.28         | 0.38         | -0.12        | 0.28         |
|                                       |             | TMPRSS2        | <b>0.15</b>  | <b>0.22</b>  | <b>0.30</b>  | <b>-0.37</b> | <b>0.22</b>  |
| <b>EpiAirway#3 (Figures 6B, 9B)</b>   | <b>ACE2</b> | <b>TMPRSS2</b> | <b>THC</b>   | <b>CBD</b>   | <b>CBGA</b>  | <b>CBN</b>   | <b>TOTAL</b> |
| #1                                    | 4.12        | 0.88           | 0.28         | 11.00        | 0.08         | 0.04         | 11.40        |
| #5                                    | 10.00       | 0.88           | 0.38         | 11.42        | 0.04         | 0.03         | 11.87        |
| #7                                    | 4.12        | 0.81           | 0.35         | 10.46        | 0.09         | 0.05         | 10.95        |
| #10                                   | 2.33        | 0.63           | 0.38         | 9.41         | 0.24         | 0.06         | 10.09        |
| #45                                   | 2.33        | 0.70           | 0.14         | 7.92         | 0.04         | 0.05         | 8.15         |
| #81                                   | 4.12        | 0.55           | 0.63         | 13.59        | 0.10         | 0.06         | 14.39        |
| #129                                  | 3.89        | 0.55           | 0.41         | 11.23        | 0.38         | 0.14         | 12.15        |
| #317                                  | 5.83        | 0.58           | 1.00         | 21.81        | 0.62         | 0.08         | 23.51        |
| <b>Correlation</b>                    | ACE2        |                | <b>0.27</b>  | <b>0.34</b>  | <b>-0.02</b> | <b>-0.22</b> | <b>0.32</b>  |
|                                       |             | TMPRSS2        | <b>-0.52</b> | <b>-0.37</b> | <b>-0.63</b> | <b>-0.75</b> | <b>-0.39</b> |

First column shows the experiment (with the reference to a corresponding Figure). Data in “ACE2” and “TMPRSS2” columns show the fold downregulation of their expression. “THC”, “CBD”, “CBGA”, “CBN” and “Total” columns show the molar concentrations for each extract. “Correlation” shows correlation between the fold downregulation and the concentration of cannabinoids for each experiment.

**Supplementary Table 2. Correlation analysis between the downregulation of ACE2 and TMPRSS2 and the level of terpenes.**

| <b>EpiOral (Figures 3, 8)</b>         | <b>ACE2</b> | <b>TMPRSS2</b> | <b>Terpenes</b> |
|---------------------------------------|-------------|----------------|-----------------|
| #1                                    | 1.59        | 0.3            | 12.34           |
| #7                                    | 1.1         | 0.22           | 6.95            |
| #317                                  | 0.71        | 0.32           | 1.93            |
| Correlation                           | ACE2        |                | <b>0.99</b>     |
|                                       |             | TMPRSS2        | <b>-0.17</b>    |
| <b>EpiOral (Figures 4B, 7A)</b>       | <b>ACE2</b> | <b>TMPRSS2</b> | <b>Terpenes</b> |
| #1                                    | 1.51        | 1.32           | 12.34           |
| #7                                    | 1.33        | 1.58           | 6.95            |
| #9                                    | 1.60        | 2.01           | 14.02           |
| Correlation                           | ACE2        |                | <b>0.99</b>     |
|                                       |             | TMPRSS2        | <b>0.35</b>     |
| <b>EpiOral (Figure 4C)</b>            | <b>ACE2</b> | <b>TMPRSS2</b> | <b>Terpenes</b> |
| #1                                    | 1.35        |                | 12.34           |
| #7                                    | 1.11        |                | 6.95            |
| #9                                    | 0.79        |                | 14.02           |
| Correlation                           | ACE2        |                | <b>-0.31</b>    |
| <b>EpiIntestinal (Figures 5A, 7B)</b> | <b>ACE2</b> | <b>TMPRSS2</b> | <b>Terpenes</b> |
| #1                                    | 0.95        | 1.20           | 12.34           |
| #7                                    | 0.88        | 1.28           | 6.95            |
| #9                                    | 1.02        | 1.27           | 14.02           |
| Correlation                           | ACE2        |                | <b>0.97</b>     |
|                                       |             | TMPRSS2        | <b>-0.35</b>    |
| <b>EpiIntestinal (Figure 5B)</b>      | <b>ACE2</b> | <b>TMPRSS2</b> | <b>Terpenes</b> |
| #1                                    | 1.41        |                | 12.34           |
| #7                                    | 1.19        |                | 6.95            |
| #9                                    | 0.92        |                | 14.02           |
| Correlation                           | ACE2        |                | <b>-0.29</b>    |
| <b>EpiAir (Figures 6A, 9A)</b>        | <b>ACE2</b> | <b>TMPRSS2</b> | <b>Terpenes</b> |
| #1                                    | 6.74        |                | 12.34           |
| #7                                    | 4.27        |                | 6.95            |
| #81                                   | 1.45        |                | 4.55            |
| #317                                  | 7.06        |                | 1.93            |
| Correlation                           | ACE2        |                | <b>0.21</b>     |
| Correlation                           | TMPRSS2     |                | <b>0.02</b>     |

First column shows the experiment (with the reference to a Figure). Data in “ACE2” and “TMPRSS2” columns show the fold downregulation of their expression. “Terpenes” column shows the percentage of all terpenes in each extract. “Correlation” shows correlation between the fold downregulation and the concentration of terpenes in each extract.

**Supplementary Table 3. Comparison of fold downregulation in ACE2 expression in different tissues and cells.**

| <b>Cultivars</b> | <b>Oral#1</b> | <b>Oral#2</b> | <b>Air#1</b> | <b>AirFT#2</b> | <b>Air#3</b> | <b>Intest</b> | <b>Average</b> |
|------------------|---------------|---------------|--------------|----------------|--------------|---------------|----------------|
| #1               | 1.09          | 1.59          |              | 6.74           | 4.12         | 1.18          | <b>2.94</b>    |
| #5               |               |               | 1.47         | 3.28           | 10           |               | <b>4.92</b>    |
| #7               | 1.32          | 1.1           |              | 4.27           | 4.12         | 1.02          | <b>2.37</b>    |
| #9               | 1.36          |               |              |                |              | 0.98          | <b>1.17</b>    |
| #10              |               |               | 1.79         | 3.2            | 2.33         |               | <b>2.44</b>    |
| #31              |               |               | 1.45         |                |              |               | <b>1.45</b>    |
| #45              | 1.26          | 0.52          |              |                | 2.33         | 2.13          | <b>1.56</b>    |
| #49              |               |               | 1.2          |                |              |               | <b>1.20</b>    |
| #81              | 1.56          |               | 0.89         | 1.45           | 4.12         |               | <b>2.01</b>    |
| #90              | 1.05          |               |              |                |              |               | <b>1.05</b>    |
| #114             |               |               | 1.27         |                |              |               | <b>1.27</b>    |
| #115             | 1.12          |               |              |                |              | 0.95          | <b>1.04</b>    |
| #129             | 1.18          |               |              | 3.37           | 3.89         | 1.2           | <b>2.41</b>    |
| #130             | 1.89          | 0.8           |              |                |              | 1.12          | <b>1.27</b>    |
| #131             | 0.86          | 0.93          |              |                |              |               | <b>0.90</b>    |
| #155             |               |               | 1.06         |                |              |               | <b>1.06</b>    |
| #157             | 1.43          |               |              |                |              |               | <b>1.43</b>    |
| #166             | 1.55          |               | 0.83         |                |              |               | <b>1.19</b>    |
| #167             | 1.65          |               |              |                |              | 1.07          | <b>1.36</b>    |
| #169             | 1.72          |               | 1            | 5.57           |              |               | <b>2.76</b>    |
| #207             |               |               | 0.85         | 0.85           |              |               | <b>0.85</b>    |
| #274             |               |               |              |                |              | 0.95          | <b>0.95</b>    |
| #317             |               | 0.71          |              | 7.06           | 5.83         |               | <b>4.53</b>    |
| <b>Average</b>   | <b>1.36</b>   | <b>0.94</b>   | <b>1.18</b>  | <b>3.98</b>    | <b>4.59</b>  | <b>1.18</b>   | <b>1.83</b>    |
